# Supplementary material for: Understanding Dissolution Rates via Continuous Flow Systems with Physiologically Relevant Metal Ion Saturation in Lysosome
Source: PubMed Central journal article supplement (PMC7075195; doi:10.3390/nano10020311), 2020-02-12
Supplement: nanomaterials-10-00311-s001.pdf [file nanomaterials-10-00311-s001.pdf]

# Understanding dissolution rates via continuous flow systems with physiologically relevant metal ion saturation in lysosome – Supplementary Material

Johannes Keller<sup>1,2</sup>, Willie Peijnenburg<sup>3,4</sup>, Kai Werle<sup>1</sup>, Robert Landsiedel<sup>1</sup>, and Wendel Wohlleben<sup>1,\*</sup>

<sup>1</sup> BASF SE, Dept. Experimental Toxicology and Ecology and Dept. Advanced Materials Research, 67056 Ludwigshafen, Germany; [johannes-georg.keller@basf.com](mailto:johannes-georg.keller@basf.com), [kai.werle@basf.com](mailto:kai.werle@basf.com)

<sup>2</sup> Institute of Pharmacy, Faculty of Biology, Chemistry & Pharmacy, Freie Universität Berlin, 14195, Berlin, Germany

<sup>3</sup> National Institute of Public Health and the Environment RIVM, P.O. Box 1, Bilthoven, The Netherlands; [willie.peijnenburg@rivm.nl](mailto:willie.peijnenburg@rivm.nl)

<sup>4</sup> Institute of Environmental Sciences (CML), Leiden University, PO Box 9518, Leiden, The Netherlands

\* Correspondence: [wendel.wohlleben@basf.com](mailto:wendel.wohlleben@basf.com); Tel.: +49-621-609-5339

Table S1: Descriptors and properties of tested engineered nanomaterials. Reproduced from Wohlleben et al. (Nanoscale, 2019).

|                                  | descriptors                                 | NM110_ZnO |      | NM111_ZnO |     | CuO |      | NM105_TiO2_nano |     | TiO2_non-nano |     | NM600_Bentonit |  | IRMM385_Kaolin |  | Kaolin |  | IRMM381_BaSO4 non-nano |  | IRMM387_NM220_BaSO4 |    |
|----------------------------------|---------------------------------------------|-----------|------|-----------|-----|-----|------|-----------------|-----|---------------|-----|----------------|--|----------------|--|--------|--|------------------------|--|---------------------|----|
|                                  |                                             | 1314-13-2 | 80   | 24        | 21  | 204 | 1362 | 181             | 279 | 234           | 32  |                |  |                |  |        |  |                        |  |                     |    |
| Composition                      | CAS no.                                     | 1314-13-2 | 80   | 24        | 21  | 204 | 1362 | 181             | 279 | 234           | 32  |                |  |                |  |        |  |                        |  |                     |    |
| Primary particle dimension       | median diameter, nm                         | 42        | 80   | 24        | 21  | 204 | 1362 | 181             | 279 | 234           | 32  |                |  |                |  |        |  |                        |  |                     |    |
| Specific surface area (BET/VSSA) | BET, m <sup>2</sup> /g                      | 12        | 14   | 34        | 51  | 15  | 52   | 16              | 24  | 2.5           | 41  |                |  |                |  |        |  |                        |  |                     |    |
|                                  | % C                                         | 30        | 67.9 | 7         | 9   |     |      |                 |     |               |     |                |  |                |  |        |  |                        |  |                     | 17 |
|                                  | % O                                         | 38        | 24.3 | 47        | 63  |     |      |                 |     |               |     |                |  |                |  |        |  |                        |  |                     | 52 |
|                                  | % metals                                    | 38        | 4.3  | 46        | 29  |     |      |                 |     |               |     |                |  |                |  |        |  |                        |  |                     | 13 |
|                                  | % non metals                                | 3         | 3.5  |           |     |     |      |                 |     |               |     |                |  |                |  |        |  |                        |  |                     | 17 |
| Surface charge (zeta-potential)  | Zeta potential at pH7, mV                   | 30        | -25  | -34       | -17 | 36  | -31  |                 | -53 | -37           | -37 |                |  |                |  |        |  |                        |  |                     |    |
| Hydrophobicity                   | water contact angle                         | 10        | 152  | 10        | 60  | 10  | 10   | 10              | 10  | 10            | 10  |                |  |                |  |        |  |                        |  |                     |    |
| Solubility in water              | OECD screening LoD or value, metal ion, ppm | 3.6       | 3.3  | 97        | ns  | ns  | 0.1  |                 | 0.8 |               | 6   |                |  |                |  |        |  |                        |  |                     |    |

Table S2: Chemical composition of phagolysosomal simulant fluid (PSF) as reproduced from Keller et al. (Sci. Rep., 2020)

| Substance                                    | PSF pH4.5 |
|----------------------------------------------|-----------|
| NaCl                                         | 6650      |
| Na <sub>2</sub> HPO <sub>4</sub>             | 142       |
| Na <sub>2</sub> SO <sub>4</sub>              | 71        |
| CaCl <sub>2</sub> 2H <sub>2</sub> O          | 29        |
| KH-Phthalate                                 | 4085      |
| Glycine                                      | 450       |
| alkylbenzylidimethylammonium chloride (ABDC) | 50        |

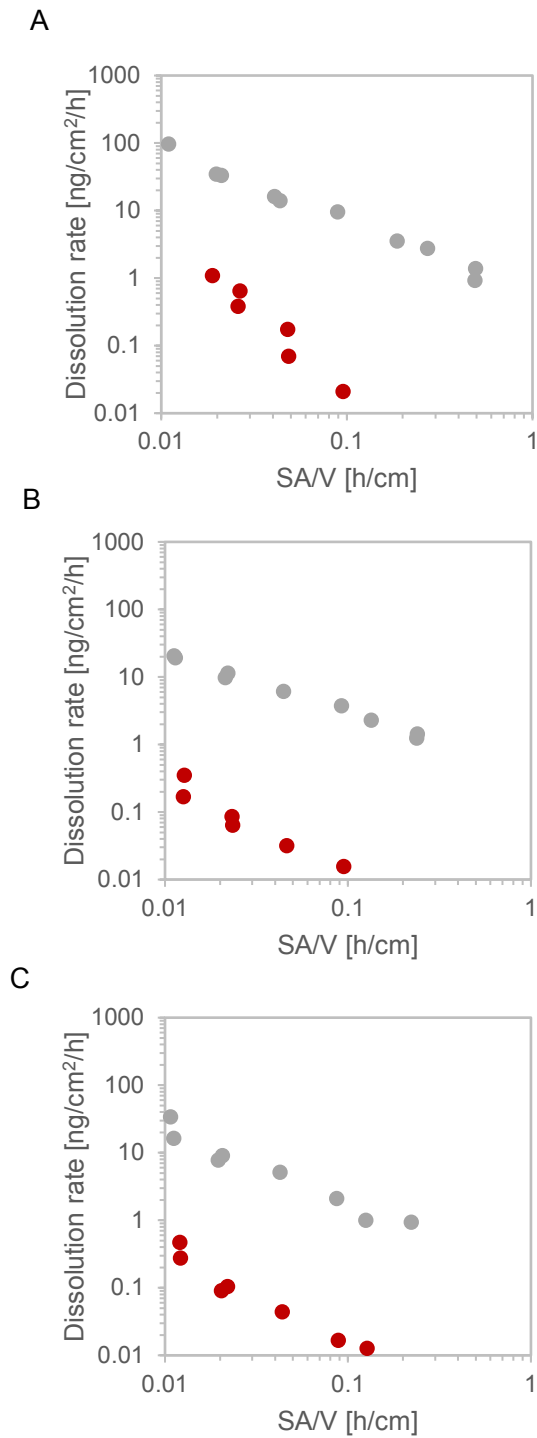

**Figure S3:** Dissolution kinetic of three different Aluminosilicates. Grey indicates the dissolution of Si ions, whereas red indicates the dissolution kinetic of Al ions. A) Bentonit NM600, B) Kaolin JRC-IRMM385, C) Kaolin (from nanoGRAVUR).

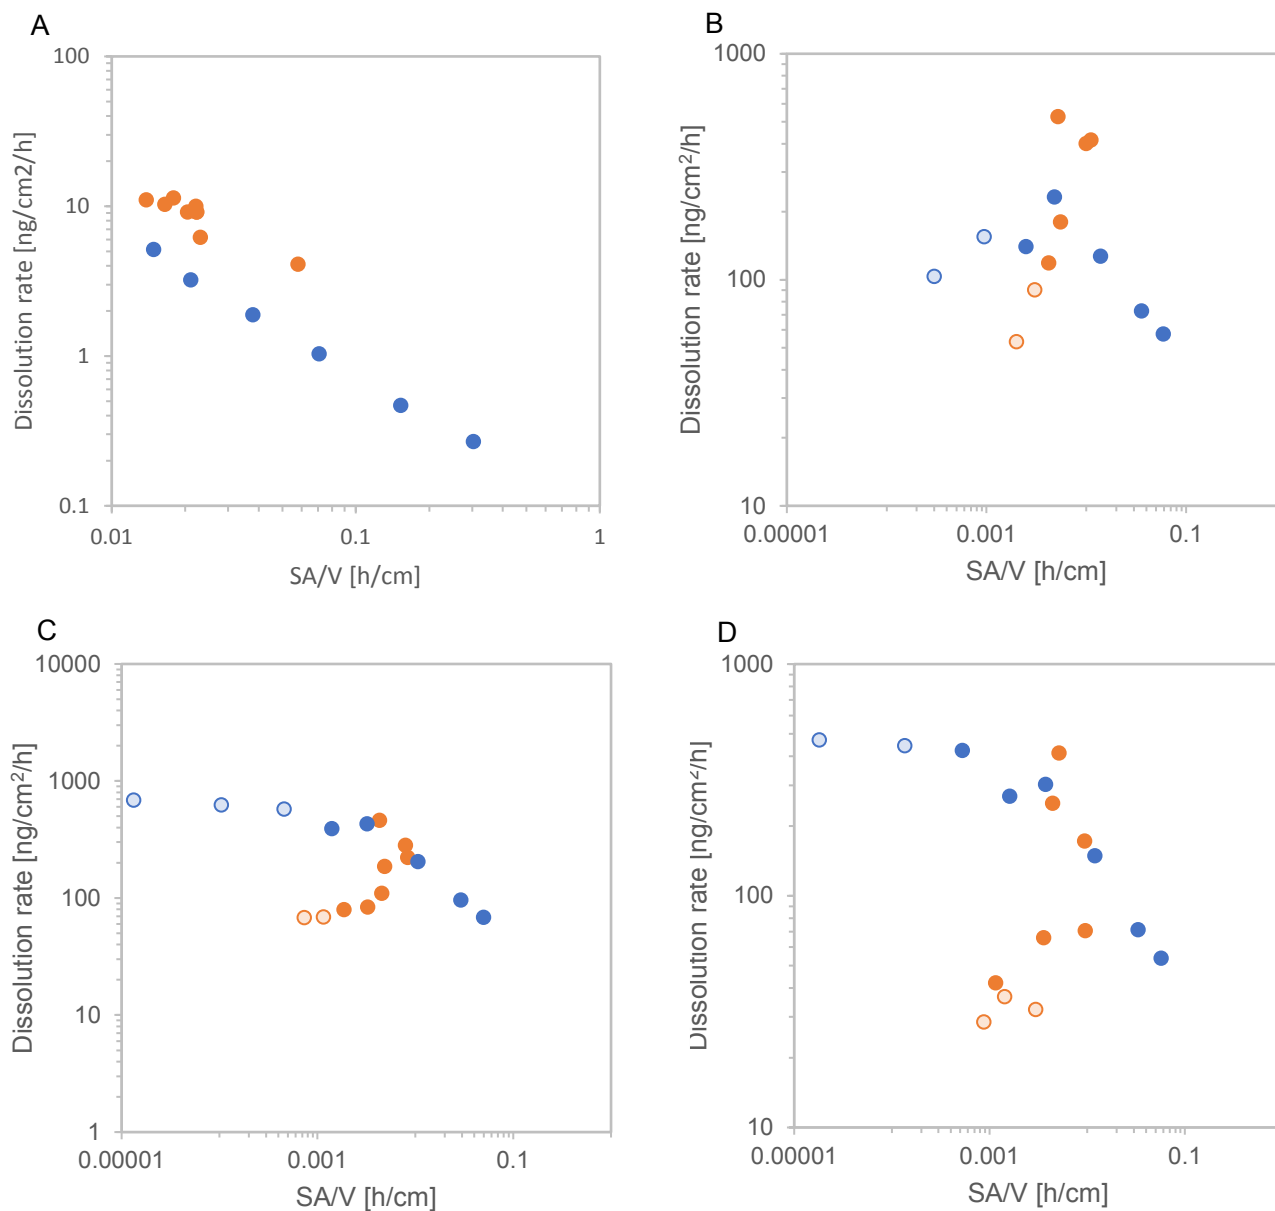

**Figure S3:** Comparison of SA/V vs. dissolution rate  $k$  between the fixed flow-rate dissolution setup (orange) and the ramped flow-rate dissolution setup (blue) for **A** BaSO<sub>4</sub> NM220, **B** CuO, **C** ZnO NM110 and **D** ZnO NM111. Unfilled circles indicate points with low reliability due to remaining mass <10%.
